# Supplementary material for: 2D and 3D bimetallic oxalate-based ferromagnets prepared by insertion of different FeIII spin crossover complexes
Source: Royal Society of Chemistry journal article supplement (doi:10.1039/c001067g), 2010-01-01
Supplement: c001067g.pdf [file c001067g.pdf]

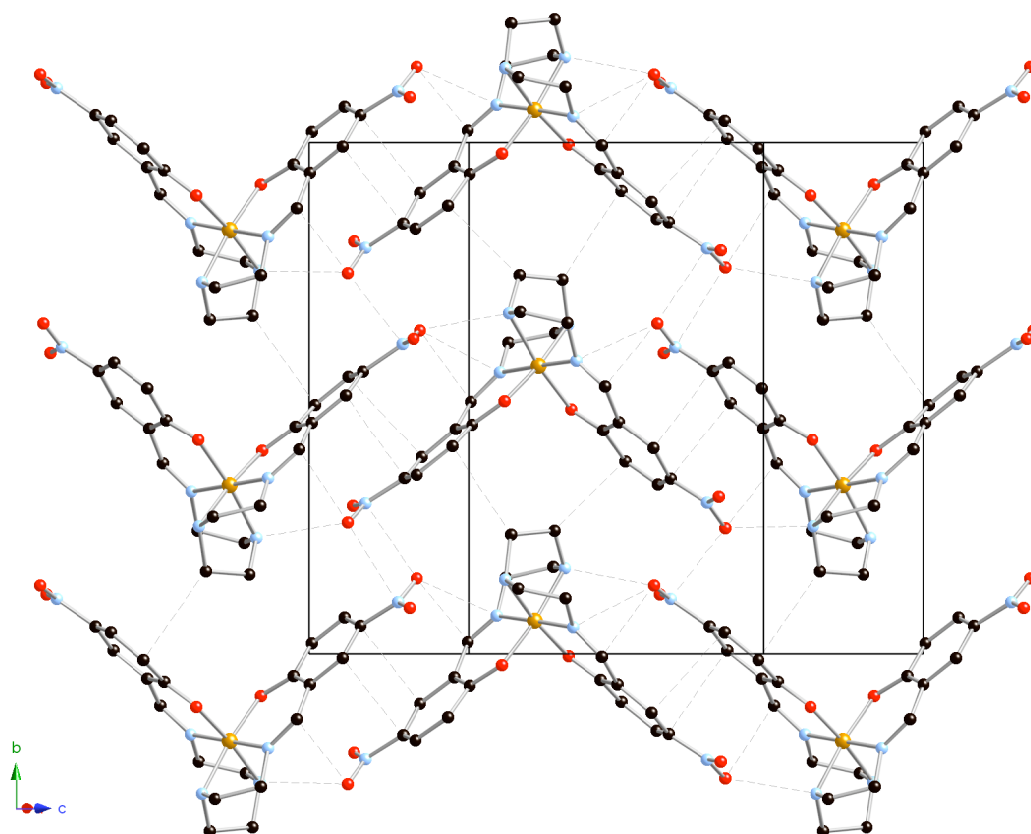

Figure S1. Projection on the  $-101$  plane of the layer of  $[\text{Fe}^{\text{III}}(5\text{-NO}_2\text{sal}_2\text{-trien})]^+$  complexes on the structure of **1** showing the intermolecular interactions between  $[\text{Fe}^{\text{III}}(5\text{-NO}_2\text{sal}_2\text{-trien})]^+$  complexes (blue-dotted lines).

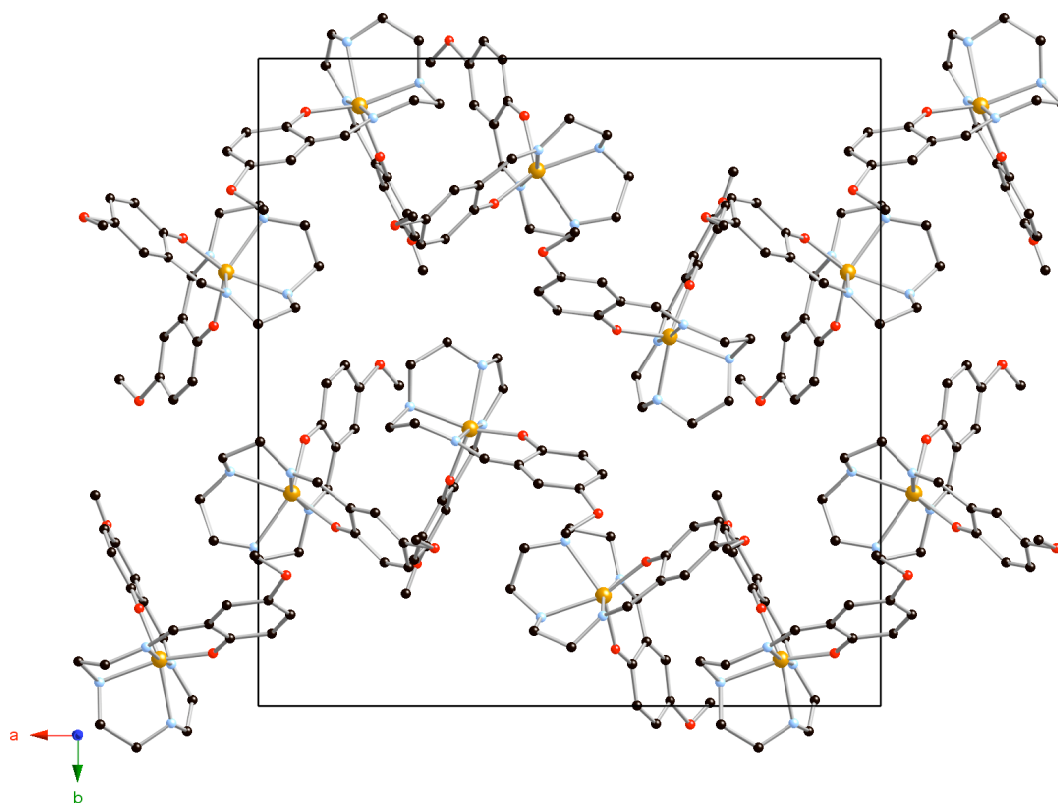

Figure S2. Projection on the *ab* plane of the [Fe<sup>III</sup>(5-CH<sub>3</sub>Osal<sub>2</sub>-trien)]<sup>+</sup> complexes on the structure of **2**.
